# Supplementary material for: Functional Role of the C-Terminal Amphipathic Helix 8 of Olfactory Receptors and Other G Protein-Coupled Receptors
Source: Int J Mol Sci. 2016 Nov 18;17(11):1930. doi: 10.3390/ijms17111930 (PMC5133925; doi:10.3390/ijms17111930)
Supplement: Supplementary file 1 [file ijms-17-01930-s001.xls]

## Sheet: tableS1
Table S1 List of human class I and class II ORs
No.	chrom.#	human class I ORs	Helix 8 second residue	homologous murine ORs	Helix 8 second residue		No.	chrom.#	human class I ORs	Helix 8 second residue	homologous murine ORs	Helix 8 second residue
1	11	OR51A2	Q				27	11	OR52B6	P	MOR31-9	Q
2	11	OR51A4	Q				28	11	OR52D1	E	MOR33-2	E
3	11	OR51A7	Q	MOR8-5	Q		29	11	OR52E2	Q	MOR32-10	Q
4	11	OR51B2	Q	MOR1-1	Q		30	11	OR52E4	Q	MOR32-11	Q
5	11	OR51B4	Q	MOR1-3	Q		31	11	OR52E6	H
6	11	OR51B5	Q				32	11	OR52E8	Q	MOR32-9, -12	Q
7	11	OR51B6	Q	MOR1-2	Q		33	11	OR52H1	Q	MOR31-12	Q
8	11	OR51D1	E	MOR18-3	E		34	11	OR52I1	Q
9	11	OR51E1	E	MOR18-1	E		35	11	OR52I2	Q	MOR41-1	Q
10	11	OR51E2	Q	MOR18-2	Q		36	11	OR52J3	Q	MOR32-13	Q
11	11	OR51F1	Q				37	11	OR52K1	Q
12	11	OR51F2	Q	MOR14-3	Q		38	11	OR52K2	Q	MOR28-1	Q
13	11	OR51G1	Q	MOR7-1	Q		39	11	OR52L1	Q	MOR37-1	Q
14	11	OR51G2	Q	MOR7-2	Q		40	11	OR52M1	Q	MOR25-1	Q
15	11	OR51I1	E	MOR13-4	E		41	11	OR52N1	Q	MOR34-6	Q
16	11	OR51I2	E	MOR13-3	E		42	11	OR52N2	Q	MOR34-1	Q
17	11	OR51L1	Q				43	11	OR52N4	Q	MOR34-5	Q
18	11	OR51M1	E	MOR3-1	E		44	11	OR52N5	Q	MOR34-6	Q
19	11	OR51Q1	Q	MOR5-1	Q		45	11	OR52R1	Q	MOR30-1	Q
20	11	OR51S1	E	MOR21-1	E		46	11	OR52W1	Q	MOR36-1	Q
21	11	OR51T1	T	MOR14-9	V		47	11	OR56A1	E
22	11	OR51V1	Q				48	11	OR56A3	E	MOR40-2, -14	E
23	11	OR52A1	Q	MOR22-3	Q		49	11	OR56A4	E	MOR40-8	E
24	11	OR52A5	Q	MOR22-2	Q		50	11	OR56A5	E	MOR40-1	E
25	11	OR52B2	Q	MOR31-6	Q		51	11	OR56B1	E	MOR40-13, -7	E(13), Q(7)
26	11	OR52B4	Q	MOR31-4	Q		52	11	OR56B4	K	MOR40-12	E
No.	chrom.#	human class II ORs	Helix 8 second residue	homologous murine ORs	Helix 8 second residue		No.	chrom.#	human class II ORs	Helix 8 second residue	homologous murine ORs	Helix 8 second residue
1	17	OR1A1	D	MOR125-5, -1	D		21	19	OR1M1	D	MOR132-1	D
2	17	OR1A2	D				22	9	OR1N1	D	MOR127-2	D
3	9	OR1B1	D	MOR158-1	D		23	9	OR1N2	D	MOR127-4	D
4	1	OR1C1	D				24	9	OR1Q1	D	MOR138-3	D
5	17	OR1D2	D	MOR127-5	D		25	11	OR1S1	D	MOR127-1	D
6	17	OR1D5	D				26	11	OR1S2	D	MOR127-1	D
7	17	OR1E1	D				27	7	OR2A1	E	MOR261-5	E
8	17	OR1E2	D	MOR135-11	D		28	7	OR2A2	Q	MOR261-11	Q
9	16	OR1F1	Y	MOR131-1	D		29	6	OR2A4	E	MOR261-6	D
10	17	OR1G1	E				30	7	OR2A5	E	MOR261-13	E
11	19	OR1I1	D	MOR128-3	D		31	7	OR2A7	E	MOR261-6	D
12	9	OR1J1	D	MOR136-14	D		32	7	OR2A12	E	MOR261-12	E
13	17	OR1J2	D	MOR136-8	D		33	7	OR2A14	E	MOR261-3,-2,-4	E
14	9	OR1J4	D	MOR136-13	D		34	7	OR2A25	E	MOR261-1	E
15	9	OR1K1	D				35	7	OR2A42	E	MOR261-5	E
16	9	OR1L1	D				36	7	OR2AE1	D
17	9	OR1L3	D				37	11	OR2AG1	E	MOR283-2	E
18	9	OR1L4	D	MOR138-1	D		38	11	OR2AG2	E	MOR283-1	E
19	9	OR1L6	D	MOR138-2	D		39	1	OR2AK2	E	MOR285-3,-1,-4	E
20	9	OR1L8	D				40	12	OR2AP1	Q	olfr765, 767, MOR101-1	Q(765,767), D(101-1)
						Table S1 List of human class I and class II ORs (continued)
No.	chrom.#	human class II ORs	Helix 8 second residue	homologous murine ORs	Helix 8 second residue		No.	chrom.#	human class II ORs	Helix 8 second residue	homologous murine ORs	Helix 8 second residue
41	1	OR2B11	D	MOR256-45	D		91	17	OR3A1	D	MOR255-4	D
42	6	OR2B2	E	MOR256-35, -10	E		92	17	OR3A2	D	MOR255-5	D
43	6	OR2B3	D				93	17	OR3A3	D	MOR255-3	D
44	5	OR2B6	E	MOR256-11	E		94	11	OR4A5	E	MOR231-11	E
45	16	OR2C1	E	MOR256-17	E		95	11	OR4A15	E	MOR231-2	E
46	1	OR2C3	E				96	11	OR4A16	E	MOR231-8	E
47	11	OR2D2	D	MOR260-1	D		97	11	OR4A47	E	MOR231-1	E
48	11	OR2D3	D	MOR260-2	D		98	11	OR4B1	E	MOR227-9	E
49	7	OR2F1	E	MOR257-8	E		99	11	OR4C3	E	MOR235-1	E
50	7	OR2F2	E	MOR257-5	E		100	11	OR4C6	E	MOR237-1	E
51	1	OR2G2	E				101	11	OR4C11	E	MOR230-2, -1, -3	E
52	1	OR2G3	D				102	11	OR4C12	E	MOR232-4	E
53	1	OR2G6	D	MOR256-56	D		103	11	OR4C13	Q	MOR232-1	Q
54	6	OR2H1	E	MOR256-20	E		104	11	OR4C15	E	MOR233-21	D
55	6	OR2H2	E	MOR256-21	E		105	11	OR4C16	E	MOR230-7	E
56	6	OR2J2	H				106	11	OR4C45	A	MOR234-2	E
57	6	OR2J3	V				107	11	OR4C46	Q
58	9	OR2K2	E	MOR262-1	E		108	17	OR4D1	D	MOR240-2	E
59	1	OR2L2	E	MOR272-1	E		109	17	OR4D2	D	MOR240-3, -1	D
60	1	OR2L3	E				110	11	OR4D5	E	MOR239-6	E
61	1	OR2L5	E				111	11	OR4D6	E	MOR239-5	E
62	1	OR2L8	E				112	11	OR4D9	E	MOR239-7	E
63	1	OR2L13	E	MOR270-1	E		113	11	OR4D10	E	MOR239-2	E
64	1	OR2M2	E				114	11	OR4D11	E	MOR239-3	E
65	1	OR2M3	E	MOR279-2	E		115	14	OR4E2	E	MOR244-3	E
66	1	OR2M4	E				116	19	OR4F4	D
67	1	OR2M5	E	MOR279-1	E		117	1	OR4F5	D
68	1	OR2M7	E				118	15	OR4F6	E	MOR245-3	E
69	9	OR2S2	D	MOR262-14	D		119	15	OR4F15	D	MOR245-5	D
70	1	OR2T1	D	MOR274-1	D		120	1	OR4F16	E	MOR245-7	E
71	1	OR2T2	D				121	19	OR4F17	D
72	1	OR2T3	D				122	8	OR4F21	E	MOR245-7	E
73	1	OR2T4	D	MOR275-4, -1, -5, -2, -3	N		123	14	OR4K1	D	MOR246-1	D
74	1	OR2T5	D				124	14	OR4K2	E	MOR247-1	E
75	1	OR2T6	D	MOR274-2	D		125	14	OR4K5	D	MOR246-6	D
76	1	OR2T8	E				126	14	OR4K13	E
77	1	OR2T10	D				127	14	OR4K14	E
78	1	OR2T11	D				128	14	OR4K15	E	MOR246-2	E
79	1	OR2T12	E				129	14	OR4K17	E
80	1	OR2T27	D				130	14	OR4L1	K	MOR247-4, -2	E
81	1	OR2T29	D				131	14	OR4M1	E	MOR242-1	E
82	1	OR2T33	E				132	15	OR4M2	E
83	1	OR2T34	D				133	14	OR4N2	E	MOR241-2	E
84	1	OR2T35	D				134	15	OR4N4	E	MOR241-1	E
85	5	OR2V1	E	MOR276-1	E		135	14	OR4N5	E	MOR241-3	E
86	5	OR2V2	E	MOR276-2	D		136	11	OR4P4	E
87	6	OR2W1	D	MOR256-3	D		137	14	OR4Q3	D	MOR243-1	D
88	1	OR2W3	E	MOR256-64	E		138	11	OR4S1	D
89	5	OR2Y1	D	MOR256-41, -50	D		139	11	OR4S2	E	MOR230-9	E
90	19	OR2Z1	E	MOR282-2, -1	E		140	11	OR4X1	E
						Table S1 List of human class I and class II ORs (continued)
No.	chrom.#	human class II ORs	Helix 8 second residue	homologous murine ORs	Helix 8 second residue		No.	chrom.#	human class II ORs	Helix 8 second residue	homologous murine ORs	Helix 8 second residue
141	11	OR4X2	E				191	7	OR6B1	E	MOR103-1	E
142	11	OR5A1	E	MOR215-3	E		192	2	OR6B2	E	MOR103-3	E
143	11	OR5A2	E				193	2	OR6B3	E
144	3	OR5AC2	K				194	12	OR6C1	Q	MOR111-1	Q
145	11	OR5AK2	E	MOR203-2	E		195	12	OR6C2	Q	MOR114-1	Q
146	11	OR5AN1	E	MOR214-4	E		196	12	OR6C3	Q	MOR111-3	Q
147	11	OR5AP2	D	MOR201-2	D		197	12	OR6C4	Q
148	11	OR5AR1	D	MOR180-1	D		198	12	OR6C6	Q	MOR110-8, -7	Q
149	11	OR5AS1	D	MOR181-2	D		199	12	OR6C65	Q	MOR113-2	Q
150	14	OR5AU1	D	MOR205-1	D		200	12	OR6C68	Q
151	11	OR5B2	E				201	12	OR6C70	Q
152	11	OR5B3	E	MOR202-29	E		202	12	OR6C74	Q	MOR109-1	Q
153	11	OR5B12	E	MOR202-7	E		203	12	OR6C75	Q	MOR112-1	Q
154	11	OR5B17	D	MOR202-15	E		204	12	OR6C76	Q
155	11	OR5B21	E	MOR202-4	E		205	1	OR6F1	E	MOR104-1	E
156	9	OR5C1	E	MOR178-1	E		206	1	OR6K2	E	MOR105-10	E
157	11	OR5D3	D				207	1	OR6K3	D
158	11	OR5D13	D				208	1	OR6K6	D	MOR105-4	E
159	11	OR5D14	D	MOR174-14	D		209	11	OR6M1	K
160	11	OR5D16	D	MOR174-9 (mOR-EG)	D		210	1	OR6N1	E	MOR105-1	E
161	11	OR5D18	D	MOR174-10	D		211	1	OR6N2	E	MOR105-5	E
162	11	OR5F1	E				212	1	OR6P1	E	MOR103-10	E
163	3	OR5H1	Q				213	11	OR6Q1	E
164	3	OR5H2	Q	MOR183-1	Q		214	14	OR6S1	Q	MOR103-18	Q
165	3	OR5H6	Q				215	11	OR6T1	K
166	3	OR5H14	Q	MOR183-5, -7	Q		216	7	OR6V1	T
167	1	OR5H15	Q	MOR183-2	Q		217	11	OR6X1	E	MOR104-3	E
168	11	OR5I1	D	MOR181-1	D		218	1	OR6Y1	E	MOR103-17	D
169	11	OR5J2	D	MOR172-1	E		219	19	OR7A10	H
170	3	OR5K1	E	MOR184-2, -3	E		220	19	OR7A17	D	MOR140-1	D
171	3	OR5K2	E	MOR184-7	E		221	19	OR7A5	D	MOR139-3	D
172	3	OR5K3	E	MOR184-5	E		222	19	OR7C1	D	MOR139-1	D
173	3	OR5K4	E	MOR184-9	E		223	19	OR7C2	D	MOR142-1	D
174	11	OR5L1	D	MOR174-1	D		224	19	OR7D2	D
175	11	OR5L2	D	MOR174-3	D		225	19	OR7D4	D	MOR144-1	D
176	11	OR5M1	D	MOR196-3	D		226	19	OR7E24	D	MOR145-2	D
177	11	OR5M3	D	MOR199-1	D		227	19	OR7G1	E	MOR147-3	D
178	11	OR5M8	N	MOR200-1	D		228	19	OR7G2	D	MOR154-1	D
179	11	OR5M9	D	MOR227-8	D		229	19	OR7G3	D	MOR153-1, -2	D
180	11	OR5M10	D	MOR196-1	D		230	11	OR8A1	E	MOR171-2, -3	E
181	11	OR5M11	D	MOR198-1	D		231	11	OR8B12	D	MOR161-2	D
182	11	OR5P2	E	MOR204-8	E		232	11	OR8B2	D	MOR164-1	D
183	11	OR5P3	E	MOR204-32(S25), -6	E(32), D(6)		233	11	OR8B3	D	MOR164-1	D
184	11	OR5R1	E	MOR185-3	E		234	11	OR8B4	D	MOR163-1	D
185	11	OR5T1	D				235	11	OR8B8	D	MOR161-6	D
186	11	OR5T2	D	MOR179-2	D		236	11	OR8D1	D	MOR171-9, -22	D
187	11	OR5T3	E	MOR179-6	D		237	11	OR8D2	D	MOR171-47, -8	D
188	6	OR5V1	D	MOR249-2, -1	D		238	11	OR8D4	E	MOR171-4	E
189	11	OR5W2	D	MOR177-9	D		239	11	OR8G1	D	MOR171-30	D
190	11	OR6A2	E	MOR103-15	E		240	11	OR8G2	M	MOR171-14	D
						Table S1 List of human class I and class II ORs (continued)
No.	chrom.#	human class II ORs	Helix 8 second residue	homologous murine ORs	Helix 8 second residue		No.	chrom.#	human class II ORs	Helix 8 second residue	homologous murine ORs	Helix 8 second residue
241	11	OR8G5	D	MOR171-11	D		282	19	OR10H5	E	Gm4461(NM_001199062.1)	E
242	11	OR8H1	E	MOR206-3	E		283	1	OR10J1	E	MOR267-8	E
243	11	OR8H2	E	MOR206-4	E		284	1	OR10J3_r	E	MOR267-3	E
244	11	OR8H3	E				285	1	OR10J5	E	MOR267-13	E
245	11	OR8I2	D	MOR207-1	D		286	1	OR10K1	E
246	11	OR8J1	D				287	1	OR10K2	E	MOR267-16	D
247	11	OR8J3	D	MOR185-2	D		288	12	OR10P1	D	MOR269-1	E
248	11	OR8K1	E	MOR194-1	E		289	11	OR10Q1	D	MOR266-1	D
249	11	OR8K3	D	MOR188-2	D		290	1	OR10R2	D
250	11	OR8K5	E	MOR187-4	E		291	11	OR10S1	E	MOR223-4	E
251	12	OR8S1	E				292	1	OR10T2	E
252	11	OR8U8	D				293	11	OR10V1	E	MOR266-4	E
253	11	OR8U9	E				294	11	OR10W1	E	MOR266-6	E
254	7	OR9A2	K	MOR120-1	K		295	1	OR10X1	D
255	7	OR9A4	K	MOR120-2	K		296	1	OR10Z1	A	MOR267-6	A
256	9	OR9G1	D	MOR213-5	D		297	6	OR11A1	E	MOR121-1	E
257	11	OR9G4	D	MOR213-4	D		298	14	OR11G2	D	MOR106-13	D
258	11	OR9G9	D				299	22	OR11H1	E
259	11	OR9I1	D	MOR211-1, -4	D		300	14	OR11H2	E
260	12	OR9K2	D	MOR210-1, -2	D		301	14	OR11H4	D	MOR106-16, -1	D
261	11	OR9Q1	E	MOR212-4	E		302	14	OR11H6	D	MOR106-11	E
262	11	OR9Q2	E				303	14	OR11H12	E
263	11	OR10A2	E				304	1	OR11L1	D	MOR107-1	D
264	11	OR10A3	E	MOR268-5	E		305	6	OR12D2	E	MOR250-2, -4	E
265	11	OR10A4	E	MOR263-5	E		306	6	OR12D3	E	MOR250-1	E
266	11	OR10A5	E	MOR263-1	E		307	10	OR13A1	E	MOR253-9	E
267	11	OR10A6	E				308	9	OR13C2	D
268	12	OR10A7	E	MOR265-1	E		309	9	OR13C3	D	MOR262-8	D
269	12	OR10AD1	E	MOR286-1, -3	E		310	9	OR13C4	D
270	11	OR10AG1	D	MOR264-17	D		311	9	OR13C5	D
271	6	OR10C1	E	MOR263-6	D		312	9	OR13C8	D	MOR262-7	D
272	14	OR10G2	E	MOR223-6, -9	E		313	9	OR13C9	D
273	14	OR10G3	E	MOR223-5	E		314	9	OR13D1	E	MOR262-9	E
274	11	OR10G4	E	MOR223-2	E		315	9	OR13F1	E	MOR262-2	E
275	11	OR10G7	E	MOR223-3	E		316	1	OR13G1	E	MOR251-4	E
276	11	OR10G8	E				317	X	OR13H1	D
277	11	OR10G9	E	MOR223-1	E		318	9	OR13J1	E	MOR262-4	E
278	19	OR10H1	E	MOR267-17, -10	E		319	1	OR14A16	A
279	19	OR10H2	E				320	1	OR14A36	Q
280	19	OR10H3	E	MOR267-1	E		321	1	OR14I1	E
281	19	OR10H4	E				322	6	OR14J1	S	MOR218-8	A
